# Supplementary material
Source: PubMed Central journal article supplement (PMC8013097)
Supplement: 2338_figures.pdf [file 2338_figures.pdf]

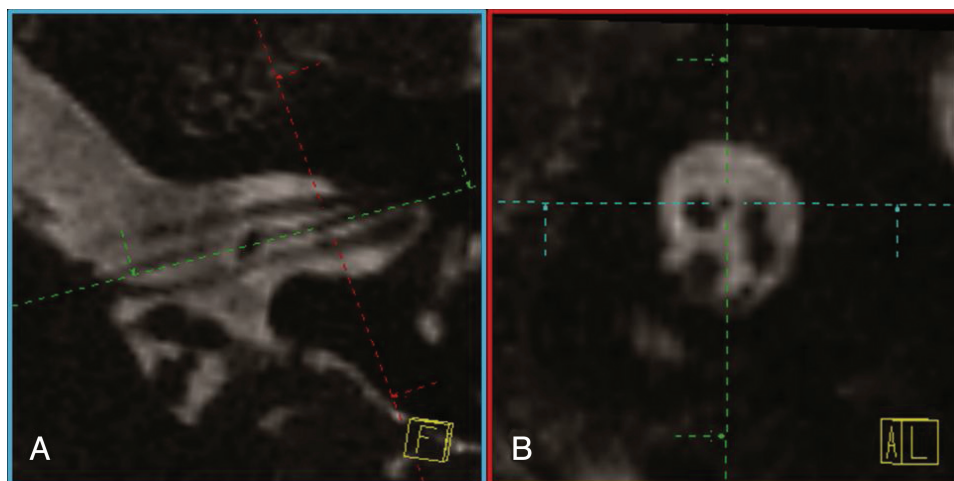

**On-Line Fig 1.** Identification of the NI using cross hairs in MPR mode (TR, 12.18 ms; TE, 6.09 ms; flip angle, 50°). A, Para-axial CISS sequence image (A) of the CPA and IAC at 3T and corresponding parasagittal image (B) in the middle third of the IAC, depicting the NI in the center of the cross hairs.

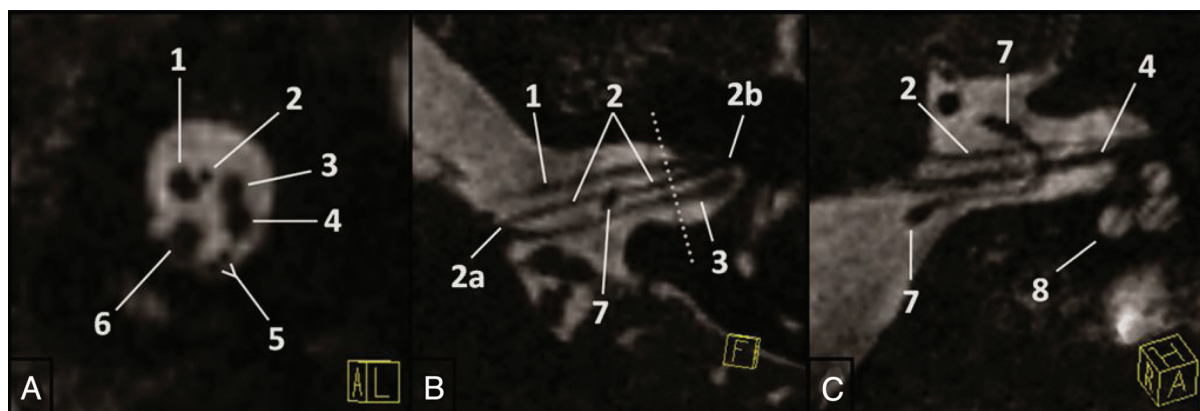

**On-Line Fig 2.** Parasagittal (A, section plane indicated by dotted reference line in B), para-axial (B), and curved (C) CISS sequence images (TR, 12.18 ms; TE, 6.09 ms; flip angle, 50°) of the left temporal bone depicting the nervus facialis (1), the NI with origin in (2a) the medullopontine sulcus and merging with (2b) the nervus facialis immediately before entering the fallopian canal (2), nervus vestibularis superior (3), nervus vestibularis inferior (4), labyrinthine artery and vein (5), nervus cochlearis (6), crossing loop of the anterior inferior cerebellar artery (7), and the cochlea (8).
